# Supplementary material for: Modulation of miRNA Expression by Dietary Polyphenols in apoE Deficient Mice: A New Mechanism of the Action of Polyphenols
Source: PubMed Central journal article supplement (PMC3254631; doi:10.1371/journal.pone.0029837), 2012-01-10
Supplement: pone.0029837.s001.pdf [file pone.0029837.s001.pdf]

**Supplement figure S1** : Chemical structures of polyphenols studied in this work.

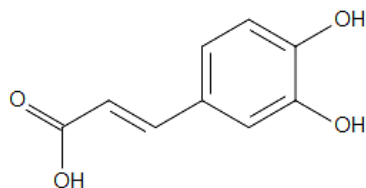

Caffeic acid

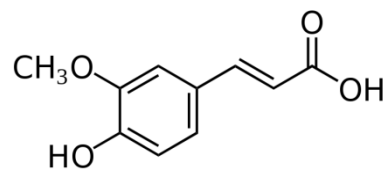

Ferulic acid

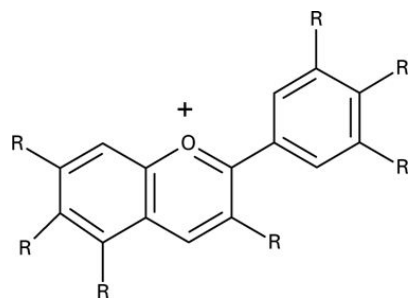

Anthocyanin

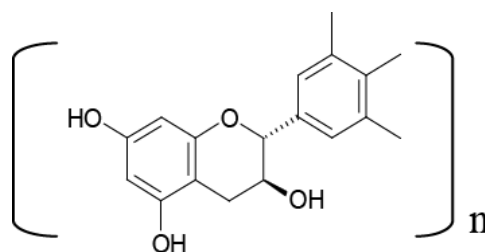

Proanthocyanin

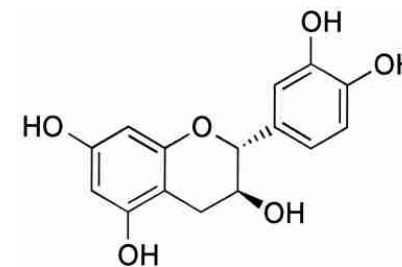

Catechin

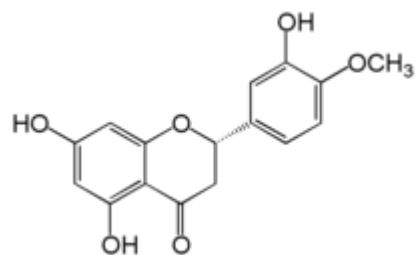

Hesperidin

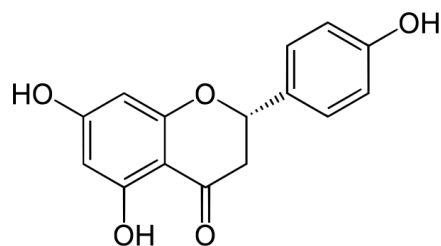

Naringenin

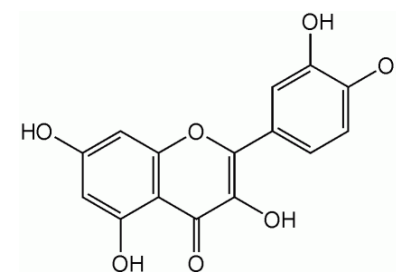

Quercetin

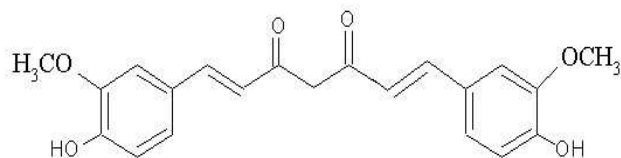

Curcumin
