# Supplementary material for: Modulation of miRNA Expression by Dietary Polyphenols in apoE Deficient Mice: A New Mechanism of the Action of Polyphenols
Source: PubMed Central journal article supplement (PMC3254631; doi:10.1371/journal.pone.0029837), 2012-01-10

# Supplement Figure S5

## A) Focal adhesion

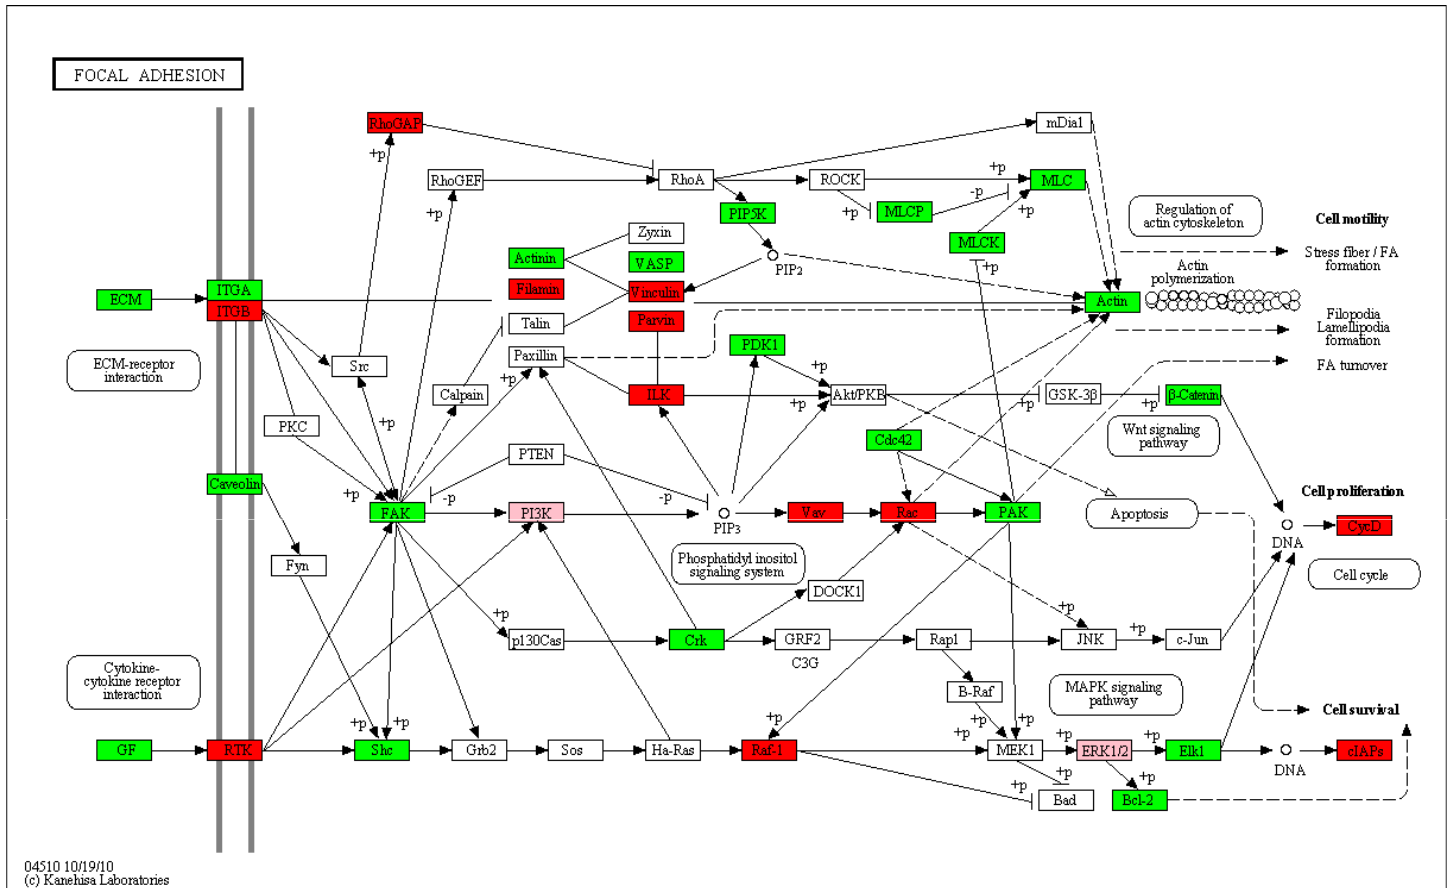

## B) Adherens junction pathway

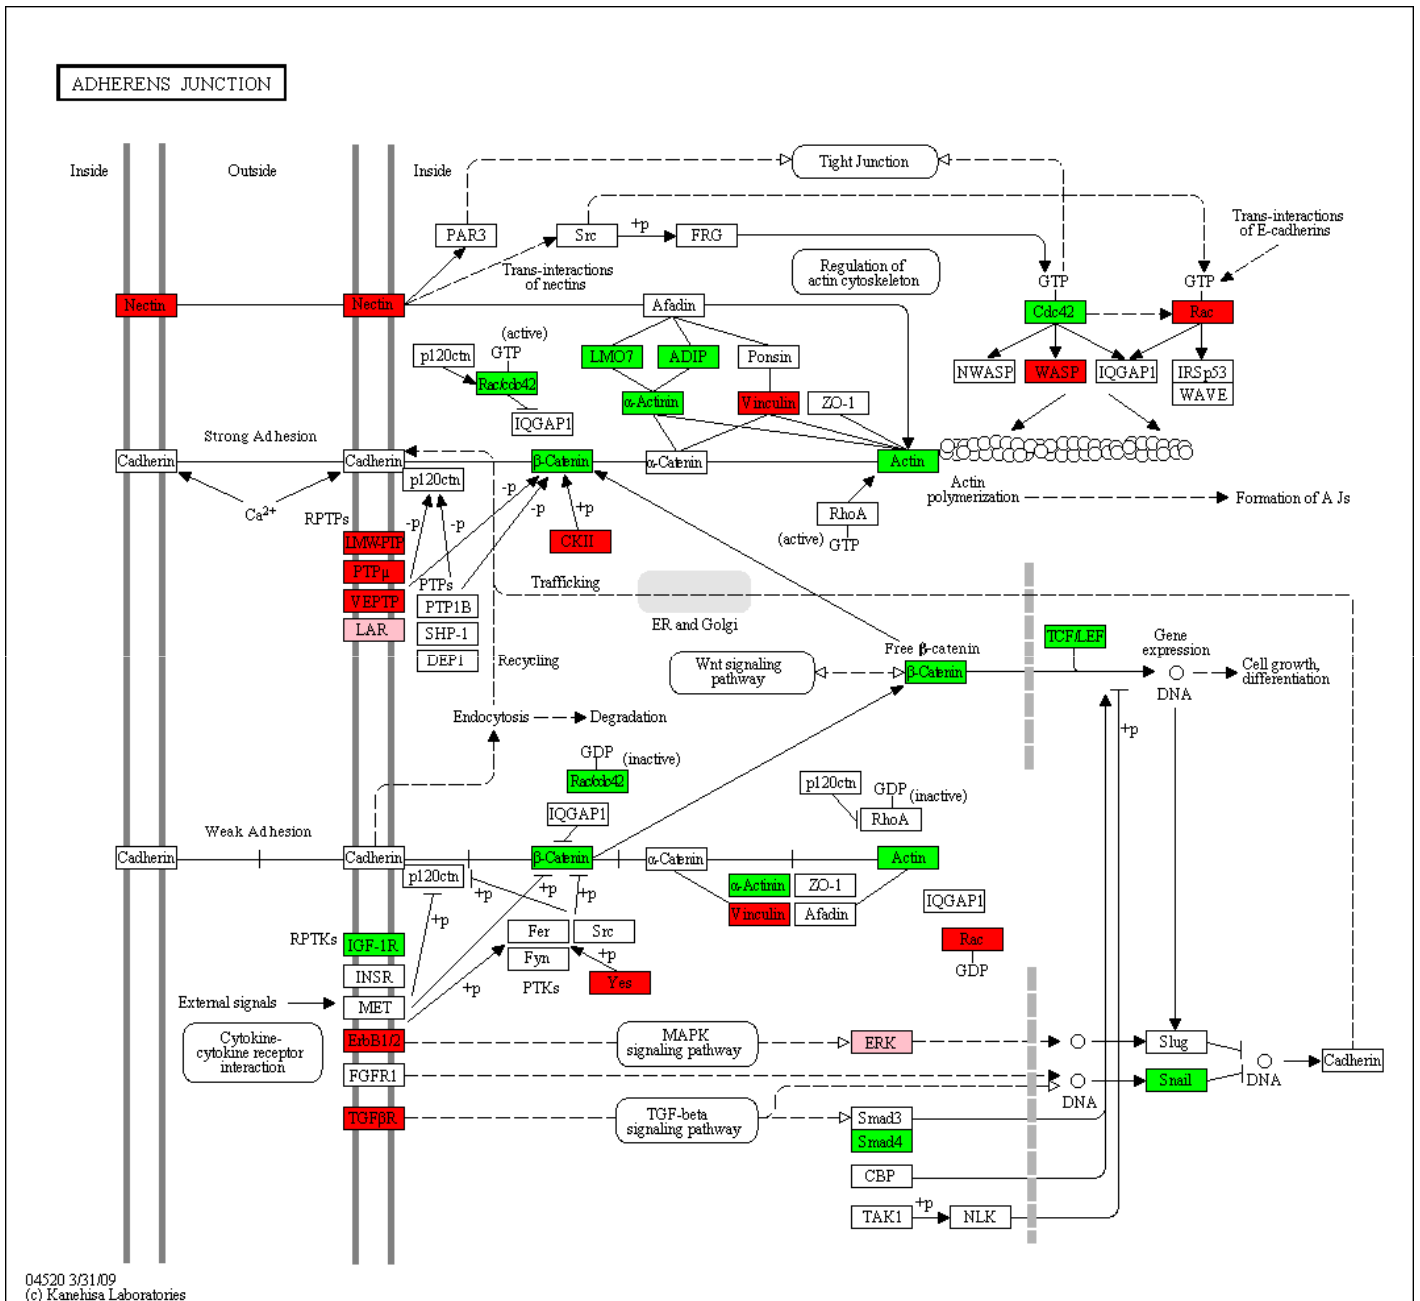

### C) Gap junction pathway

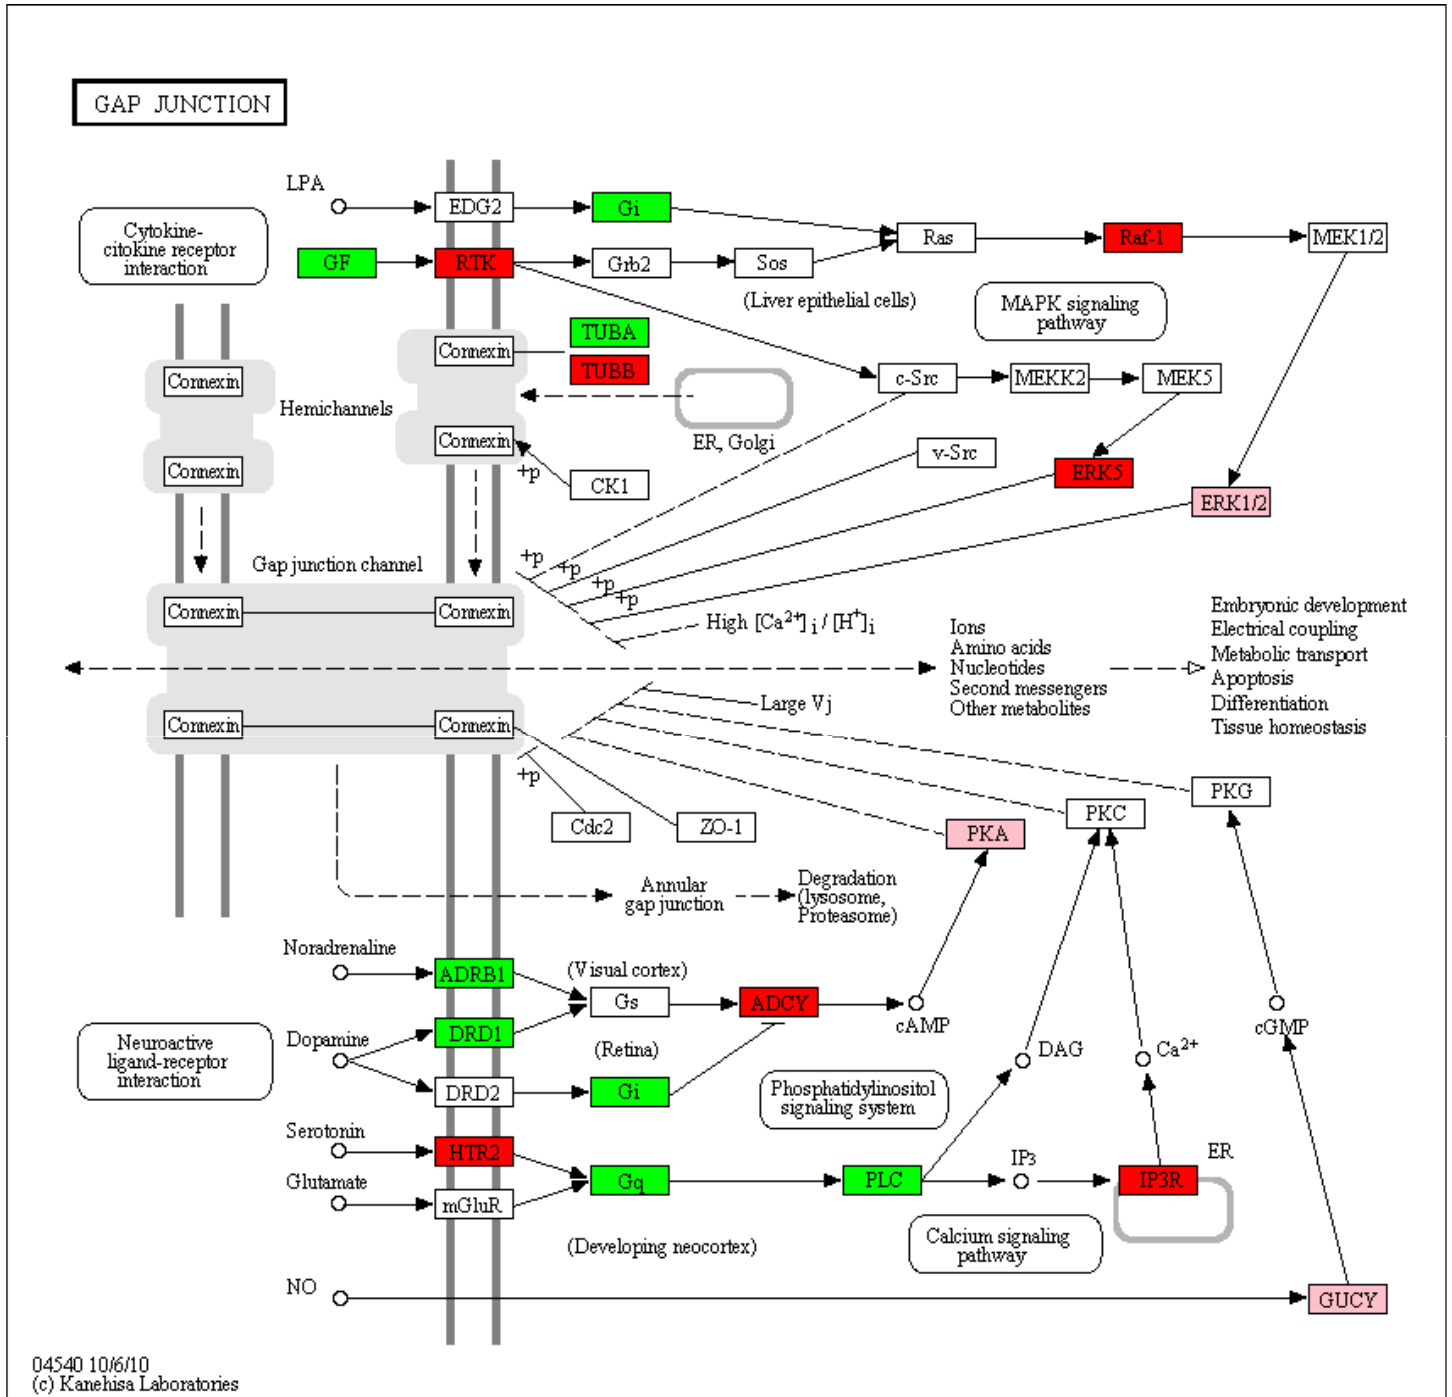

# D) Cell adhesion molecules

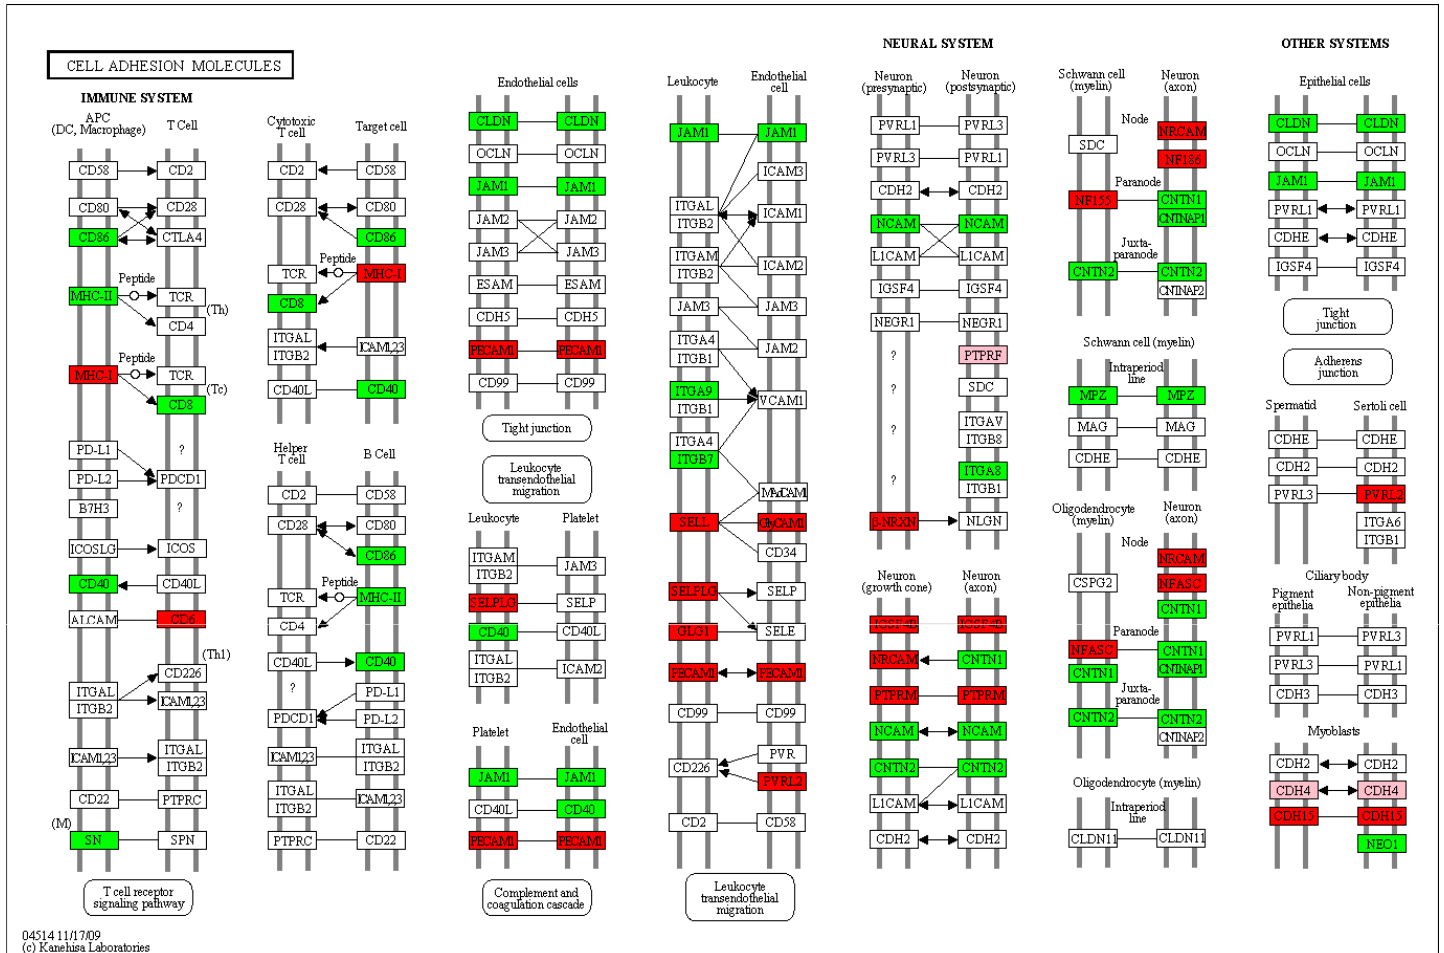

Supplement: pone.0029837.s005.pdf [file pone.0029837.s005.pdf]
