# Supplementary material for: Modulation of miRNA Expression by Dietary Polyphenols in apoE Deficient Mice: A New Mechanism of the Action of Polyphenols
Source: PubMed Central journal article supplement (PMC3254631; doi:10.1371/journal.pone.0029837), 2012-01-10
Supplement: pone.0029837.s006.pdf [file pone.0029837.s006.pdf]

**Supplement table S1** : Composition of the semi-synthetic diet

| <b><u>Control diet</u></b> |                   | <b><u>Polyphenols diet</u></b> |                   |
|----------------------------|-------------------|--------------------------------|-------------------|
| <b>Ingredients</b>         | <b>Percentage</b> | <b>Ingredients</b>             | <b>Percentage</b> |
| Wheat Starch               | 62,95             | Wheat Starch                   | 62,95             |
| Casein                     | 20                | Casein                         | 20                |
| Corn oil                   | 7                 | Corn oil                       | 7                 |
| Cellulose                  | 5                 | Cellulose                      | 5                 |
| Mineral mix AIN-93G        | 3,5               | Mineral mix AIN-93G            | 3,5               |
| Vitamin mix AIN-93G        | 1                 | Vitamin mix AIN-93G            | 1                 |
| L-cystin                   | 0,3               | L-cystin                       | 0,3               |
| Choline bitartrate         | 0,25              | Choline bitartrate             | 0,25              |
| <i>Total</i>               | <i>100</i>        | Polyphenol*                    |                   |
|                            |                   | <i>Total</i>                   | <i>100</i>        |

\* - proanthocyanidins, cafein acid or ferulic acid : 0,2%

- curcuin, catechin, anthocyanins, quesrcetin, narengin or hesperidin : 0,02%

Corresponding quantities of polyphenols were deduced from wheat starch amount
