# Supplementary material for: Modulation of miRNA Expression by Dietary Polyphenols in apoE Deficient Mice: A New Mechanism of the Action of Polyphenols
Source: PubMed Central journal article supplement (PMC3254631; doi:10.1371/journal.pone.0029837), 2012-01-10
Supplement: pone.0029837.s007.pdf [file pone.0029837.s007.pdf]

**Supplement table S2** : List of identified differentially expressed miRNA with their fold-change

| <b>ID</b>       | <b>ApoE-/-</b> | <b>Cafeic acid</b> | <b>Ferulic acid</b> | <b>Anthocyanin</b> | <b>Catechin</b> | <b>Curcumin</b> | <b>Hesperidin</b> | <b>Narangin</b> | <b>Proanthocyanin</b> | <b>Quercetin</b> |
|-----------------|----------------|--------------------|---------------------|--------------------|-----------------|-----------------|-------------------|-----------------|-----------------------|------------------|
| mmu-let-7a      | 2,15           |                    |                     |                    |                 |                 | -1,93             |                 |                       |                  |
| mmu-let-7b*     | -2,92          | 2,77               | 2,36                | 3,63               | 1,76            |                 | 1,68              |                 | 1,72                  | 2,42             |
| mmu-let-7c      | 1,62           |                    |                     |                    |                 |                 | -1,57             |                 |                       |                  |
| mmu-let-7c-2*   | 1,65           |                    | -1,77               | -1,95              | -1,53           |                 |                   | -1,67           | -2,38                 | -1,70            |
| mmu-let-7d      | 1,80           |                    |                     |                    |                 |                 | -1,87             |                 |                       |                  |
| mmu-let-7e      | 2,71           |                    |                     |                    |                 | -1,66           | -1,67             |                 |                       |                  |
| mmu-let-7f      | 2,74           |                    |                     |                    |                 |                 | -2,18             |                 |                       |                  |
| mmu-let-7f*     | -2,92          |                    | 1,80                | 2,43               | 2,41            |                 |                   |                 |                       | 2,87             |
| mmu-let-7g      | 1,77           |                    |                     |                    |                 |                 | -1,78             |                 |                       |                  |
| mmu-let-7i      | 1,68           |                    |                     |                    |                 |                 |                   |                 |                       |                  |
| mmu-miR-1       | 3,33           | -2,23              | -2,86               | -2,53              | 7,55            | -2,99           | 3,44              |                 | 1,13                  | -2,19            |
| mmu-miR-100     | 1,77           |                    |                     |                    |                 |                 |                   |                 |                       |                  |
| mmu-miR-101a    |                |                    |                     |                    |                 |                 | -1,58             |                 |                       |                  |
| mmu-miR-101b    |                |                    |                     |                    |                 |                 | -1,53             |                 |                       |                  |
| mmu-miR-106a    |                |                    |                     |                    |                 |                 | 1,53              | 2,25            | 1,77                  |                  |
| mmu-miR-107     |                |                    |                     |                    |                 |                 | -1,52             |                 |                       |                  |
| mmu-miR-10a     | 2,00           |                    |                     |                    |                 |                 | -1,60             |                 |                       |                  |
| mmu-miR-10b     | 3,55           |                    |                     |                    |                 |                 |                   | -1,99           |                       | -1,53            |
| mmu-miR-1224    | -2,24          |                    |                     |                    |                 |                 | 2,46              |                 |                       |                  |
| mmu-miR-125a-3p |                | -1,83              |                     | -1,57              | -3,31           |                 |                   |                 | -1,56                 |                  |
| mmu-miR-125a-5p | 2,53           |                    |                     |                    |                 | -1,58           |                   | 1,76            |                       |                  |
| mmu-miR-126-3p  | 1,83           |                    |                     |                    |                 |                 |                   |                 |                       |                  |
| mmu-miR-126-5p  | 1,93           |                    |                     |                    |                 | -1,56           | -1,53             | -1,59           |                       |                  |
| mmu-miR-128     |                |                    |                     |                    |                 | 2,35            | 2,90              |                 |                       | 2,83             |
| mmu-miR-129-3p  |                |                    |                     |                    |                 | 1,53            |                   |                 |                       |                  |
| mmu-miR-132     |                |                    |                     |                    |                 |                 |                   | 1,85            |                       |                  |

|                 |       |       |       |       |       |       |       |       |      |
|-----------------|-------|-------|-------|-------|-------|-------|-------|-------|------|
| mmu-miR-133a    |       |       | 2,53  | -1,63 | 1,81  | -1,58 | 4,52  |       |      |
| mmu-miR-133b    |       |       | 7,22  |       | 4,13  |       | 9,47  |       |      |
| mmu-miR-135a*   | -3,24 |       |       | 1,91  | 2,93  | 6,31  |       |       |      |
| mmu-miR-135b    |       |       |       |       | 1,85  |       |       |       |      |
| mmu-miR-136     | 2,15  |       | -1,67 | -1,86 | -1,57 |       |       |       |      |
| mmu-miR-137     | 2,40  | -1,68 | -1,82 | -1,62 | -2,16 | -1,96 |       | -1,58 |      |
| mmu-miR-139-3p  |       |       |       | -2,49 |       |       | 1,85  |       |      |
| mmu-miR-140     | 2,17  |       |       |       | -1,52 | -1,52 |       |       |      |
| mmu-miR-140*    | 1,62  |       |       |       |       |       |       |       |      |
| mmu-miR-141     |       |       | -1,51 | -1,68 |       | -1,57 | -1,74 |       |      |
| mmu-miR-142-3p  | 2,75  |       |       |       | -1,79 |       |       |       |      |
| mmu-miR-142-5p  | 1,96  |       |       |       | -1,74 |       |       |       |      |
| mmu-miR-144     |       |       | 3,24  | -1,84 |       |       |       | 4,16  |      |
| mmu-miR-145*    | -1,70 |       |       |       |       |       |       |       |      |
| mmu-miR-146a    | 1,64  |       |       |       | -1,55 |       |       |       |      |
| mmu-miR-146b    | 2,20  | -1,74 | -1,53 | -1,75 | -1,82 | -1,66 | -1,75 | -2,22 |      |
| mmu-miR-148a    | 1,53  |       |       |       |       | -1,53 |       |       |      |
| mmu-miR-149     |       | 1,58  | 1,85  | 1,54  |       |       |       |       |      |
| mmu-miR-150     | 1,73  |       |       |       | -1,53 |       | 1,75  |       |      |
| mmu-miR-151-5p  | 1,52  |       |       |       |       |       |       |       |      |
| mmu-miR-154     | 2,00  |       |       | -1,68 | -1,72 |       | -1,74 |       |      |
| mmu-miR-155     | 2,23  | -1,79 | -1,69 |       | -2,60 |       | -1,72 |       |      |
| mmu-miR-15b     | 2,13  |       |       |       | -1,58 |       |       |       |      |
| mmu-miR-15b*    |       | 1,72  |       |       |       |       |       |       |      |
| mmu-miR-16      | 1,72  |       |       |       |       |       |       |       |      |
| mmu-miR-17      |       |       | 1,67  |       |       |       | 1,75  | 2,27  |      |
| mmu-miR-181a    |       |       |       |       | -1,51 | 1,77  | 1,53  | 1,62  | 1,60 |
| mmu-miR-181a-1* |       |       |       |       |       | 2,15  |       |       |      |
| mmu-miR-181b    |       |       | 1,68  |       |       |       |       |       |      |
| mmu-miR-185     |       |       |       |       |       | -1,62 |       |       |      |

|                |       |       |       |       |       |       |       |       |       |       |
|----------------|-------|-------|-------|-------|-------|-------|-------|-------|-------|-------|
| mmu-miR-186    | 1,53  |       |       |       |       |       |       |       |       |       |
| mmu-miR-186*   | 1,87  |       |       | -1,52 | -1,63 |       |       | -1,58 |       |       |
| mmu-miR-188-5p | -1,89 |       |       |       | 1,69  | 2,00  |       | 3,52  |       |       |
| mmu-miR-18a    |       |       | -1,65 | 1,75  |       | -1,78 |       | 1,89  |       |       |
| mmu-miR-190    | 3,13  |       | -2,56 |       | -3,34 |       |       | -2,84 | -2,63 | -2,22 |
| mmu-miR-190b   | 2,32  |       | -1,54 | 2,44  | -1,83 | 1,82  |       |       | -1,80 |       |
| mmu-miR-191*   | -2,13 | 1,85  | 1,74  |       | 4,31  | 1,82  | 1,99  |       | 1,73  |       |
| mmu-miR-192    | 1,65  |       |       |       |       |       | -1,69 |       |       |       |
| mmu-miR-193    |       |       |       |       |       |       | -1,53 |       |       |       |
| mmu-miR-195    | 1,73  |       |       |       |       |       |       |       |       |       |
| mmu-miR-196a   | 2,47  | -1,66 |       | -1,87 | -1,53 | -2,21 |       | -2,15 | -2,18 | -1,63 |
| mmu-miR-196b   | 1,73  | -1,66 | -2,13 | -1,87 | -1,81 | -1,53 |       | -2,16 | -2,39 | -1,63 |
| mmu-miR-197    |       | -1,72 |       |       | -5,55 | -2,73 | -2,82 | -3,89 | -1,56 | -4,36 |
| mmu-miR-199b   | 2,46  |       |       |       |       | -1,51 | -1,56 |       |       |       |
| mmu-miR-199b*  | 1,86  |       |       |       |       |       |       |       |       |       |
| mmu-miR-19a    | 1,94  |       |       |       |       | -1,57 |       |       |       |       |
| mmu-miR-19b    | 1,54  |       |       |       |       |       |       |       |       |       |
| mmu-miR-200a   | 1,54  |       |       |       |       |       |       |       |       |       |
| mmu-miR-200b   | 2,35  |       |       |       |       |       |       |       |       |       |
| mmu-miR-200c   |       |       | 1,52  |       | 2,47  | 1,85  |       |       | 1,79  |       |
| mmu-miR-201    |       |       |       |       |       |       | 1,73  |       |       |       |
| mmu-miR-202-3p |       |       |       |       | -1,96 |       |       |       |       |       |
| mmu-miR-207    | -1,95 |       |       |       |       |       |       |       |       |       |
| mmu-miR-20a    | 1,86  |       |       |       |       |       |       |       |       |       |
| mmu-miR-20b    | 1,87  |       |       |       |       |       |       |       |       |       |
| mmu-miR-21     | 1,97  |       |       |       |       | -1,52 | -1,54 |       |       |       |
| mmu-miR-21*    |       |       | 1,56  |       |       |       |       |       |       | 1,83  |
| mmu-miR-210    | 1,72  |       |       |       |       |       |       | 1,81  |       | 1,66  |
| mmu-miR-211    | -1,52 |       |       |       |       |       |       |       |       | 1,66  |
| mmu-miR-212    |       |       |       |       | -2,84 |       |       |       |       |       |

|                 |       |       |       |       |       |       |       |       |       |       |
|-----------------|-------|-------|-------|-------|-------|-------|-------|-------|-------|-------|
| mmu-miR-214     |       |       |       |       | 1,70  |       |       |       | 2,17  |       |
| mmu-miR-219     |       |       |       |       |       |       |       |       | -1,69 |       |
| mmu-miR-222     |       | -1,58 |       |       |       |       |       | -1,92 |       |       |
| mmu-miR-223     | 3,26  |       |       |       |       |       | -1,96 |       |       |       |
| mmu-miR-224     |       |       |       |       |       |       |       | 1,56  |       |       |
| mmu-miR-23a     | 1,68  |       |       |       |       |       |       | -1,54 |       |       |
| mmu-miR-23b     |       |       |       |       |       |       |       | -1,53 |       |       |
| mmu-miR-24-1*   |       | 1,66  | 1,74  |       | 1,65  |       |       | -2,13 |       |       |
| mmu-miR-26b     | 2,16  |       |       |       |       |       |       | -1,89 |       |       |
| mmu-miR-26b*    |       |       |       |       |       |       |       | 2,22  |       |       |
| mmu-miR-28      | 1,57  |       |       |       |       |       |       |       |       |       |
| mmu-miR-290-3p  | -2,27 |       |       | 2,62  | 2,56  |       |       | 1,73  |       | 2,99  |
| mmu-miR-290-5p  |       |       |       |       | -3,48 |       |       |       | 1,67  |       |
| mmu-miR-291b-3p | 2,13  |       | -1,82 | -1,59 |       | -1,89 |       | -1,83 | -2,27 |       |
| mmu-miR-291b-5p | -3,53 | 2,43  | 3,46  | 3,95  | 5,19  | 2,75  | 2,65  | 2,19  | 1,87  | 3,93  |
| mmu-miR-292-5p  |       |       |       |       |       |       | 1,57  |       | -1,57 |       |
| mmu-miR-294     |       |       |       |       | -1,66 |       | 2,94  | -1,92 | -2,49 |       |
| mmu-miR-296-5p  | -2,19 | 1,93  | 1,84  | 1,78  | 4,22  | 1,95  | 1,95  | 1,62  | 1,72  | 1,79  |
| mmu-miR-297a    |       |       |       |       |       |       |       |       | -1,55 |       |
| mmu-miR-298     | -2,39 | 1,52  | 2,17  | 2,27  | 2,31  |       | 2,15  | 1,55  |       | 1,69  |
| mmu-miR-29a*    | 2,82  | -1,75 | -1,73 | -2,49 |       | -1,83 | -1,56 | -3,25 | -1,89 | -1,75 |
| mmu-miR-29b*    |       |       |       |       |       | -2,40 | 2,44  |       |       | -1,65 |
| mmu-miR-301a    | 1,54  |       |       |       |       |       |       |       |       |       |
| mmu-miR-302a    |       |       |       |       | 2,53  |       | 1,80  |       | -1,51 |       |
| mmu-miR-302b    | 1,56  |       |       |       |       |       |       |       | -1,76 |       |
| mmu-miR-302c    |       |       |       |       |       |       |       |       | -1,63 |       |
| mmu-miR-302d    | 2,73  |       | -1,79 | -1,57 | -1,75 | -1,87 | -1,69 | -1,87 | -2,35 |       |
| mmu-miR-30b     | 1,59  |       |       |       |       |       | -1,69 |       |       |       |
| mmu-miR-30b*    | 2,57  | -1,94 | -1,99 | -3,37 | -2,97 | -2,64 | -1,80 | -1,65 |       | -2,72 |
| mmu-miR-30c     | 1,53  |       |       |       |       |       | -1,81 |       |       |       |

|                 |       |       |       |       |       |       |       |       |       |       |
|-----------------|-------|-------|-------|-------|-------|-------|-------|-------|-------|-------|
| mmu-miR-30c-1*  | 1,72  | -2,25 | -2,89 | -2,54 | -2,82 | -2,59 | -1,88 | -2,92 | -2,77 | -2,29 |
| mmu-miR-30e*    | 1,63  |       |       |       |       |       | -1,58 |       |       |       |
| mmu-miR-31      |       |       |       |       | 1,63  |       |       | 1,63  |       |       |
| mmu-miR-31*     | 1,72  | -1,53 |       |       | 1,54  | -1,55 |       |       |       |       |
| mmu-miR-32      | 1,58  |       |       |       | -1,77 |       | -1,80 |       |       |       |
| mmu-miR-322     | 1,80  |       |       |       |       |       | -1,67 |       |       |       |
| mmu-miR-324-5p  | -1,73 |       | 2,11  | 1,65  | 2,52  | 2,99  | 2,68  | 2,22  | 2,88  | 1,65  |
| mmu-miR-326     | -1,67 |       | 1,86  |       | 1,52  |       |       |       |       |       |
| mmu-miR-328     | -1,94 | 1,79  |       | 1,69  |       |       |       |       |       |       |
| mmu-miR-33      |       |       |       |       |       |       | -1,57 |       |       |       |
| mmu-miR-335-3p  | 1,94  | -1,58 |       | -1,79 | -1,99 |       | -1,93 | -2,58 | -2,67 | -1,55 |
| mmu-miR-335-5p  | 2,99  |       |       | -2,27 | -1,78 | -2,69 |       | -1,66 |       | -1,63 |
| mmu-miR-338-3p  | 1,62  |       |       |       |       |       |       |       |       |       |
| mmu-miR-340-3p  | 2,86  |       |       |       |       |       | -1,63 |       |       |       |
| mmu-miR-342-3p  | 3,20  |       |       |       |       |       |       |       |       |       |
| mmu-miR-345-5p  |       |       |       |       | 1,59  |       |       |       |       |       |
| mmu-miR-34a     | 2,94  |       |       |       | 1,55  | -1,68 |       | 1,86  |       |       |
| mmu-miR-34b-5p  | 1,52  |       |       |       |       |       |       |       |       |       |
| mmu-miR-350     | 2,35  |       |       |       |       |       | -2,17 |       |       |       |
| mmu-miR-362-3p  | 1,56  |       |       |       |       |       |       |       |       |       |
| mmu-miR-362-5p  | 1,73  |       |       |       |       | -1,52 |       |       |       |       |
| mmu-miR-370     | -3,22 |       |       |       |       |       | 3,43  |       |       |       |
| mmu-miR-374     |       |       | 2,33  | 1,90  | 2,90  |       |       | 2,48  | 2,13  |       |
| mmu-miR-374*    | 2,93  | -1,96 | -2,52 | -2,22 | -2,47 | -2,63 | -2,39 | -2,55 | -3,31 | -1,93 |
| mmu-miR-375     |       |       |       |       |       |       |       |       |       | 1,58  |
| mmu-miR-376b*   |       |       |       |       | 2,27  |       |       |       |       |       |
| mmu-miR-423-5p  | -1,69 |       | 1,96  |       | 1,79  | 1,54  |       |       |       | 1,70  |
| mmu-miR-425     |       |       |       |       |       | -1,57 | -1,62 |       |       |       |
| mmu-miR-429     |       | 1,63  | 2,56  | 2,48  | 1,78  |       | 1,81  |       |       | 1,84  |
| mmu-miR-450a-3p |       |       |       |       |       |       |       |       | -1,67 |       |

|                 |       |       |       |       |       |       |       |       |       |       |
|-----------------|-------|-------|-------|-------|-------|-------|-------|-------|-------|-------|
| mmu-miR-450a-5p | 1,96  |       | -2,51 | -1,86 | -1,58 | -3,30 | -1,56 | -1,86 |       | -2,41 |
| mmu-miR-450b-3p |       |       |       |       |       |       | 2,90  |       |       |       |
| mmu-miR-450b-5p |       |       |       |       |       |       |       |       | -1,51 |       |
| mmu-miR-451     | 2,53  |       |       |       | 3,68  | -2,57 |       | 1,64  |       | 3,87  |
| mmu-miR-455     |       |       |       |       |       |       |       | -1,67 |       |       |
| mmu-miR-455*    |       | -1,85 |       |       | -2,33 | -2,49 |       | -2,48 | -2,37 | -1,82 |
| mmu-miR-463*    |       |       |       |       |       |       | 1,70  |       |       |       |
| mmu-miR-464     | 1,64  |       |       |       |       |       |       |       | -1,85 |       |
| mmu-miR-466c-5p | 1,80  | -1,85 |       | -2,35 | -2,67 | -2,79 | 1,53  | -1,77 |       | -1,98 |
| mmu-miR-466f-3p | -2,46 |       | 2,56  |       |       |       | 2,25  | 1,99  |       | 2,16  |
| mmu-miR-466g    |       |       |       |       |       |       | 2,20  |       |       |       |
| mmu-miR-467b    |       | 1,62  |       |       |       |       |       |       |       |       |
| mmu-miR-467b*   |       | -2,66 | -1,53 | -1,94 | -3,34 | -3,57 | -3,24 | -3,46 | -2,63 | -2,61 |
| mmu-miR-467c    |       | 1,72  |       |       |       |       |       |       |       |       |
| mmu-miR-469     | 1,74  |       |       |       |       | -1,56 | 1,64  |       | -1,97 |       |
| mmu-miR-483     |       |       |       |       |       | 1,65  |       | 1,89  |       |       |
| mmu-miR-483*    |       |       | -1,56 |       | 1,56  |       |       |       | -1,73 |       |
| mmu-miR-486     |       |       |       | 3,47  | 4,45  |       | 2,82  | 3,65  | 2,34  | 1,28  |
| mmu-miR-487b    |       |       |       |       | -2,16 |       | -2,92 |       | -1,51 |       |
| mmu-miR-494     | -6,46 |       |       |       |       |       | 3,94  | 1,54  |       |       |
| mmu-miR-505     | 1,57  |       |       |       |       |       |       |       | -1,78 |       |
| mmu-miR-532-5p  | 2,40  | -1,59 |       | -2,81 |       | -3,53 | -1,78 |       |       |       |
| mmu-miR-539     |       |       |       |       |       |       |       |       | -1,65 |       |
| mmu-miR-541     |       |       | 1,90  |       |       |       |       | -1,59 |       | 1,62  |
| mmu-miR-542-3p  | 1,74  |       |       |       |       | -1,57 |       | -1,52 | -2,00 |       |
| mmu-miR-551b    |       |       |       |       | -1,56 | -1,67 | -1,52 | -1,62 | -1,56 |       |
| mmu-miR-574-3p  | -2,39 | 1,61  | 2,49  |       |       |       | 1,72  | 1,87  |       |       |
| mmu-miR-590-3p  |       |       |       |       |       |       | 1,54  |       |       |       |
| mmu-miR-669a    |       |       |       |       | 1,95  |       |       | -1,89 | -2,27 |       |
| mmu-miR-669c    |       | -1,54 |       |       | -1,53 | -1,54 |       |       |       |       |



|              |       |       |       |       |       |       |       |       |       |       |
|--------------|-------|-------|-------|-------|-------|-------|-------|-------|-------|-------|
| mmu-miR-92b  | -1,95 |       |       |       |       |       |       |       |       |       |
| mmu-miR-98   | 2,69  |       |       |       |       |       | -1,86 |       |       |       |
| mmu-miR-99b  |       |       |       |       | 2,94  | 1,76  |       | 3,00  | 2,56  | 1,95  |
| <hr/>        |       |       |       |       |       |       |       |       |       |       |
| max FC up    | 3,55  | 2,77  | 3,46  | 3,95  | 7,55  | 2,99  | 4,13  | 7,20  | 9,47  | 4,16  |
| min FC       | -9,72 | -2,66 | -2,89 | -3,37 | -5,89 | -3,57 | -3,24 | -3,89 | -3,31 | -4,36 |
| <br>         |       |       |       |       |       |       |       |       |       |       |
| moyenne down | -2,60 | -1,83 | -2,00 | -1,98 | -2,28 | -2,03 | -1,82 | -2,08 | -2,02 | -2,02 |
| moyenne up   | 2,00  | 1,86  | 2,10  | 2,33  | 2,54  | 1,95  | 2,27  | 2,38  | 2,56  | 2,19  |
