# Supplementary material for: Modulation of miRNA Expression by Dietary Polyphenols in apoE Deficient Mice: A New Mechanism of the Action of Polyphenols
Source: PubMed Central journal article supplement (PMC3254631; doi:10.1371/journal.pone.0029837), 2012-01-10
Supplement: pone.0029837.s009.pdf [file pone.0029837.s009.pdf]

### Supplement table S4

|                                                                 | miR-291b-5p | miR-296-5p | miR-30c-1* | miR-467b* | miR-374* |
|-----------------------------------------------------------------|-------------|------------|------------|-----------|----------|
| 1- and 2-Methylnaphthalene degradation                          | 1           | 1          | 1          | 0         | 1        |
| 1,1,1-Trichloro-2,2-bis(4-chlorophenyl)ethane (DDT) degradation | 0           | 0          | 1          | 0         | 0        |
| 2,4-Dichlorobenzoate degradation                                | 0           | 0          | 2          | 0         | 0        |
| ABC transporters - General                                      | 2           | 0          | 0          | 0         | 0        |
| Adherens junction                                               | 2           | 5          | 2          | 0         | 0        |
| Adipocytokine signaling pathway                                 | 2           | 4          | 1          | 3         | 0        |
| Alanine and aspartate metabolism                                | 1           | 1          | 2          | 1         | 1        |
| Alkaloid biosynthesis II                                        | 0           | 1          | 2          | 0         | 0        |
| Alzheimer's disease                                             | 1           | 1          | 2          | 0         | 0        |
| Aminoacyl-tRNA biosynthesis                                     | 1           | 2          | 1          | 0         | 1        |
| Aminophosphonate metabolism                                     | 0           | 0          | 1          | 0         | 0        |
| Aminosugars metabolism                                          | 4           | 1          | 1          | 0         | 0        |
| Androgen and estrogen metabolism                                | 2           | 0          | 1          | 1         | 2        |
| Antigen processing and presentation                             | 4           | 1          | 2          | 0         | 2        |
| Apoptosis                                                       | 1           | 2          | 2          | 5         | 2        |
| Arachidonic acid metabolism                                     | 5           | 3          | 5          | 1         | 0        |
| Arginine and proline metabolism                                 | 4           | 0          | 3          | 0         | 1        |
| Ascorbate and aldarate metabolism                               | 2           | 0          | 0          | 1         | 2        |
| ATP synthesis                                                   | 0           | 0          | 2          | 0         | 1        |
| Atrazine degradation                                            | 0           | 1          | 1          | 0         | 1        |
| Axon guidance                                                   | 4           | 6          | 7          | 1         | 0        |
| B cell receptor signaling pathway                               | 0           | 4          | 2          | 3         | 1        |
| Basal transcription factors                                     | 1           | 0          | 1          | 3         | 1        |
| Benzoate degradation via CoA ligation                           | 1           | 2          | 2          | 2         | 2        |
| Benzoate degradation via hydroxylation                          | 0           | 0          | 1          | 0         | 1        |
| beta-Alanine metabolism                                         | 3           | 0          | 2          | 1         | 0        |
| Bile acid biosynthesis                                          | 2           | 0          | 1          | 1         | 3        |
| Biosynthesis of steroids                                        | 1           | 0          | 0          | 1         | 0        |
| Biotin metabolism                                               | 1           | 0          | 1          | 0         | 0        |
| Bisphenol A degradation                                         | 3           | 1          | 1          | 1         | 3        |
| Blood group glycolipid biosynthesis - neolactoseries            | 0           | 1          | 0          | 0         | 0        |
| Butanoate metabolism                                            | 3           | 0          | 1          | 2         | 2        |
| C21-Steroid hormone metabolism                                  | 2           | 1          | 0          | 0         | 1        |
| Calcium signaling pathway                                       | 3           | 4          | 6          | 3         | 7        |
| Caprolactam degradation                                         | 0           | 2          | 0          | 1         | 0        |
| Carbon fixation                                                 | 0           | 3          | 1          | 0         | 1        |
| Cell adhesion molecules (CAMs)                                  | 10          | 4          | 1          | 0         | 2        |
| Cell Communication                                              | 4           | 10         | 15         | 0         | 4        |
| Cell cycle                                                      | 6           | 4          | 5          | 4         | 3        |
| Chondroitin sulfate biosynthesis                                | 0           | 1          | 0          | 0         | 0        |
| Circadian rhythm                                                | 1           | 1          | 1          | 0         | 1        |
| Citrate cycle (TCA cycle)                                       | 1           | 0          | 0          | 1         | 0        |
| Complement and coagulation cascades                             | 5           | 4          | 1          | 1         | 1        |

|                                                       |   |    |    |   |    |
|-------------------------------------------------------|---|----|----|---|----|
| Cyanoamino acid metabolism                            | 0 | 1  | 1  | 0 | 0  |
| Cysteine metabolism                                   | 1 | 2  | 1  | 1 | 0  |
| Cytokine-cytokine receptor interaction                | 5 | 6  | 10 | 9 | 10 |
| Diterpenoid biosynthesis                              | 0 | 1  | 0  | 0 | 0  |
| DNA polymerase                                        | 1 | 0  | 1  | 2 | 1  |
| Dorso-ventral axis formation                          | 1 | 3  | 3  | 0 | 1  |
| ECM-receptor interaction                              | 2 | 4  | 4  | 2 | 1  |
| Ethylbenzene degradation                              | 1 | 2  | 1  | 0 | 1  |
| Fatty acid elongation in mitochondria                 | 0 | 0  | 0  | 0 | 1  |
| Fatty acid metabolism                                 | 2 | 0  | 0  | 2 | 1  |
| Fc epsilon RI signaling pathway                       | 2 | 5  | 3  | 2 | 3  |
| Fluorene degradation                                  | 0 | 0  | 1  | 0 | 0  |
| Focal adhesion                                        | 5 | 10 | 11 | 3 | 4  |
| Folate biosynthesis                                   | 0 | 2  | 1  | 2 | 1  |
| Fructose and mannose metabolism                       | 3 | 1  | 4  | 1 | 4  |
| Galactose metabolism                                  | 2 | 0  | 1  | 1 | 3  |
| gamma-Hexachlorocyclohexane degradation               | 1 | 1  | 1  | 1 | 1  |
| Gap junction                                          | 2 | 4  | 6  | 3 | 4  |
| Glutamate metabolism                                  | 1 | 2  | 0  | 1 | 0  |
| Glutathione metabolism                                | 1 | 3  | 1  | 1 | 2  |
| Glycan structures - biosynthesis 1                    | 5 | 2  | 2  | 2 | 1  |
| Glycan structures - biosynthesis 2                    | 0 | 1  | 0  | 0 | 0  |
| Glycan structures - degradation                       | 0 | 1  | 1  | 0 | 0  |
| Glycerolipid metabolism                               | 0 | 3  | 1  | 0 | 1  |
| Glycerophospholipid metabolism                        | 3 | 7  | 3  | 1 | 2  |
| Glycine, serine and threonine metabolism              | 3 | 0  | 3  | 1 | 3  |
| Glycolysis / Gluconeogenesis                          | 0 | 2  | 4  | 1 | 3  |
| Glycosaminoglycan degradation                         | 0 | 0  | 1  | 0 | 0  |
| Glycosphingolipid metabolism                          | 1 | 1  | 0  | 0 | 0  |
| Glycosylphosphatidylinositol(GPI)-anchor biosynthesis | 0 | 1  | 0  | 0 | 0  |
| Glyoxylate and dicarboxylate metabolism               | 1 | 0  | 1  | 0 | 0  |
| Hedgehog signaling pathway                            | 0 | 3  | 1  | 1 | 0  |
| Hematopoietic cell lineage                            | 2 | 4  | 0  | 2 | 1  |
| Heparan sulfate biosynthesis                          | 0 | 1  | 2  | 0 | 0  |
| Histidine metabolism                                  | 2 | 1  | 3  | 0 | 2  |
| Huntington's disease                                  | 1 | 1  | 0  | 0 | 1  |
| Inositol phosphate metabolism                         | 1 | 3  | 2  | 3 | 1  |
| Insulin signaling pathway                             | 2 | 9  | 5  | 4 | 4  |
| Jak-STAT signaling pathway                            | 3 | 7  | 1  | 4 | 9  |
| Keratan sulfate biosynthesis                          | 1 | 0  | 0  | 0 | 0  |
| Leukocyte transendothelial migration                  | 2 | 4  | 0  | 1 | 4  |
| Limonene and pinene degradation                       | 1 | 2  | 1  | 1 | 1  |
| Linoleic acid metabolism                              | 4 | 1  | 1  | 3 | 2  |
| Long-term depression                                  | 5 | 2  | 5  | 2 | 2  |
| Long-term potentiation                                | 1 | 3  | 3  | 1 | 0  |

|                                                     |    |    |    |   |   |
|-----------------------------------------------------|----|----|----|---|---|
| Lysine biosynthesis                                 | 2  | 0  | 0  | 0 | 1 |
| Lysine degradation                                  | 6  | 0  | 2  | 3 | 4 |
| MAPK signaling pathway                              | 14 | 15 | 6  | 3 | 5 |
| Maturity onset diabetes of the young                | 1  | 0  | 1  | 1 | 0 |
| Metabolism of xenobiotics by cytochrome P450        | 3  | 1  | 3  | 3 | 3 |
| mTOR signaling pathway                              | 2  | 2  | 1  | 1 | 1 |
| Natural killer cell mediated cytotoxicity           | 1  | 5  | 9  | 4 | 6 |
| Neuroactive ligand-receptor interaction             | 8  | 8  | 11 | 6 | 8 |
| Neurodegenerative Disorders                         | 0  | 1  | 1  | 0 | 1 |
| N-Glycan biosynthesis                               | 3  | 0  | 0  | 2 | 1 |
| N-Glycan degradation                                | 0  | 1  | 0  | 0 | 0 |
| Nicotinate and nicotinamide metabolism              | 3  | 2  | 2  | 1 | 1 |
| Nitrobenzene degradation                            | 0  | 0  | 2  | 0 | 0 |
| Nitrogen metabolism                                 | 0  | 1  | 1  | 1 | 2 |
| Notch signaling pathway                             | 0  | 2  | 2  | 0 | 0 |
| Nucleotide sugars metabolism                        | 3  | 0  | 0  | 1 | 2 |
| O-Glycan biosynthesis                               | 2  | 0  | 0  | 0 | 0 |
| Olfactory transduction                              | 0  | 1  | 0  | 0 | 1 |
| One carbon pool by folate                           | 0  | 1  | 0  | 0 | 2 |
| Oxidative phosphorylation                           | 2  | 3  | 3  | 2 | 3 |
| Pantothenate and CoA biosynthesis                   | 1  | 2  | 0  | 0 | 0 |
| Parkinson's disease                                 | 1  | 2  | 0  | 0 | 0 |
| Pentose and glucuronate interconversions            | 1  | 0  | 0  | 1 | 1 |
| Pentose phosphate pathway                           | 0  | 1  | 2  | 0 | 1 |
| Phenylalanine metabolism                            | 0  | 0  | 2  | 0 | 1 |
| Phenylalanine, tyrosine and tryptophan biosynthesis | 0  | 0  | 1  | 0 | 0 |
| Phosphatidylinositol signaling system               | 1  | 5  | 3  | 5 | 2 |
| Porphyrin and chlorophyll metabolism                | 1  | 0  | 0  | 1 | 0 |
| Prion disease                                       | 0  | 1  | 1  | 0 | 0 |
| Propanoate metabolism                               | 1  | 1  | 0  | 3 | 4 |
| Proteasome                                          | 1  | 1  | 4  | 0 | 0 |
| Purine metabolism                                   | 6  | 3  | 8  | 6 | 0 |
| Pyrimidine metabolism                               | 6  | 2  | 2  | 3 | 1 |
| Pyruvate metabolism                                 | 1  | 2  | 0  | 2 | 2 |
| Regulation of actin cytoskeleton                    | 6  | 10 | 13 | 2 | 3 |
| Regulation of autophagy                             | 0  | 1  | 0  | 0 | 3 |
| Riboflavin metabolism                               | 1  | 0  | 0  | 0 | 0 |
| Ribosome                                            | 3  | 1  | 1  | 0 | 3 |
| RNA polymerase                                      | 2  | 1  | 1  | 2 | 0 |
| Selenoamino acid metabolism                         | 0  | 1  | 2  | 0 | 0 |
| SNARE interactions in vesicular transport           | 3  | 0  | 0  | 2 | 0 |
| Starch and sucrose metabolism                       | 1  | 2  | 0  | 3 | 2 |
| Streptomycin biosynthesis                           | 1  | 0  | 0  | 1 | 1 |
| Styrene degradation                                 | 1  | 0  | 1  | 0 | 0 |
| T cell receptor signaling pathway                   | 1  | 4  | 3  | 3 | 2 |

|                                            |   |   |   |   |   |
|--------------------------------------------|---|---|---|---|---|
| Taste transduction                         | 0 | 2 | 1 | 1 | 0 |
| Taurine and hypotaurine metabolism         | 1 | 1 | 2 | 0 | 0 |
| Terpenoid biosynthesis                     | 1 | 0 | 0 | 1 | 0 |
| Tetrachloroethene degradation              | 2 | 0 | 0 | 1 | 2 |
| TGF-beta signaling pathway                 | 2 | 3 | 3 | 3 | 1 |
| Thiamine metabolism                        | 1 | 0 | 0 | 0 | 0 |
| Tight junction                             | 2 | 3 | 4 | 0 | 0 |
| Toll-like receptor signaling pathway       | 2 | 0 | 1 | 4 | 4 |
| Tryptophan metabolism                      | 2 | 0 | 4 | 2 | 1 |
| Type I diabetes mellitus                   | 5 | 0 | 0 | 2 | 0 |
| Type II diabetes mellitus                  | 1 | 4 | 1 | 1 | 1 |
| Tyrosine metabolism                        | 3 | 1 | 3 | 0 | 1 |
| Ubiquinone biosynthesis                    | 0 | 0 | 1 | 0 | 0 |
| Urea cycle and metabolism of amino groups  | 1 | 1 | 2 | 0 | 0 |
| Valine, leucine and isoleucine degradation | 2 | 0 | 1 | 3 | 2 |
| VEGF signaling pathway                     | 5 | 3 | 3 | 1 | 1 |
| Vitamin B6 metabolism                      | 1 | 1 | 0 | 0 | 0 |
| Wnt signaling pathway                      | 2 | 7 | 4 | 0 | 0 |
