# Supplementary material for: Modulation of miRNA Expression by Dietary Polyphenols in apoE Deficient Mice: A New Mechanism of the Action of Polyphenols
Source: PubMed Central journal article supplement (PMC3254631; doi:10.1371/journal.pone.0029837), 2012-01-10
Supplement: pone.0029837.s011.pdf [file pone.0029837.s011.pdf]

**Supplement table S6**

|                                  | <b>ApoE -/-</b> | <b>Cafeic acid</b> | <b>Ferulic acid</b> | <b>Anthocyane</b> | <b>Catechin</b> | <b>Curcumin</b> | <b>Hesperidine</b> | <b>Naringin</b> | <b>Proanthocyanidin</b> | <b>Quercetin</b> |
|----------------------------------|-----------------|--------------------|---------------------|-------------------|-----------------|-----------------|--------------------|-----------------|-------------------------|------------------|
| <i>average FC up-regulated</i>   | 1,49            | 1,46               | 1,50                | 1,32              | 1,46            | 1,52            | 1,61               | 1,57            | 1,47                    | 1,48             |
| <i>average FC down-regulated</i> | 0,73            | 0,72               | 0,70                | 0,77              | 0,72            | 0,71            | 0,68               | 0,70            | 0,68                    | 0,71             |
| <i>max up</i>                    | 4,68            | 3,88               | 5,02                | 2,28              | 7,42            | 10,05           | 5,58               | 5,11            | 4,08                    | 3,47             |
| <i>min down</i>                  | 0,38            | 0,30               | 0,29                | 0,27              | 0,20            | 0,32            | 0,38               | 0,40            | 0,35                    | 0,20             |
