# Supplementary material for: Modulation of miRNA Expression by Dietary Polyphenols in apoE Deficient Mice: A New Mechanism of the Action of Polyphenols
Source: PubMed Central journal article supplement (PMC3254631; doi:10.1371/journal.pone.0029837), 2012-01-10
Supplement: pone.0029837.s012.pdf [file pone.0029837.s012.pdf]

Supplement table S7

| pathways                                                        | ApoE -/- | Cafeic acid | Ferulic acid | Quercetin | Catechin | Hesperidin | Narangin | Proanthocyanidin | Anthocyanidin | Curcumin |
|-----------------------------------------------------------------|----------|-------------|--------------|-----------|----------|------------|----------|------------------|---------------|----------|
| 1- and 2-Methylnaphthalene degradation                          | 0        | 0           | 5            | 1         | 1        | 4          | 3        | 1                | 0             | 1        |
| 1,1,1-Trichloro-2,2-bis(4-chlorophenyl)ethane (DDT) degradation | 0        | 0           | 0            | 0         | 0        | 0          | 0        | 0                | 0             | 0        |
| 2,4-Dichlorobenzoate degradation                                | 0        | 0           | 1            | 0         | 0        | 2          | 0        | 0                | 0             | 0        |
| ABC transporters - General                                      | 4        | 2           | 3            | 2         | 3        | 6          | 3        | 2                | 8             | 1        |
| Acute myeloid leukemia                                          | 0        | 0           | 0            | 0         | 0        | 0          | 0        | 0                | 9             | 0        |
| Adherens junction                                               | 3        | 2           | 9            | 4         | 1        | 14         | 1        | 4                | 13            | 3        |
| Adipocytokine signaling pathway                                 | 3        | 2           | 6            | 7         | 2        | 10         | 1        | 3                | 5             | 6        |
| Alanine and aspartate metabolism                                | 0        | 1           | 3            | 1         | 1        | 4          | 1        | 1                | 4             | 1        |
| Aldosterone-regulated sodium reabsorption                       | 0        | 0           | 0            | 0         | 0        | 0          | 0        | 0                | 10            | 0        |
| Alkaloid biosynthesis I                                         | 1        | 0           | 0            | 1         | 0        | 1          | 0        | 1                | 0             | 0        |
| Alkaloid biosynthesis II                                        | 0        | 0           | 3            | 1         | 0        | 5          | 4        | 1                | 0             | 0        |
| Alzheimer's disease                                             | 2        | 0           | 2            | 1         | 0        | 4          | 0        | 2                | 24            | 0        |
| Amino sugar and nucleotide sugar metabolism                     | 0        | 0           | 0            | 0         | 0        | 0          | 0        | 0                | 8             | 0        |
| Aminoacyl-tRNA biosynthesis                                     | 2        | 3           | 4            | 3         | 1        | 3          | 1        | 1                | 5             | 1        |
| Aminophosphonate metabolism                                     | 2        | 1           | 3            | 2         | 1        | 4          | 0        | 2                | 0             | 0        |
| Aminosugars metabolism                                          | 2        | 1           | 7            | 4         | 4        | 7          | 2        | 2                | 0             | 1        |
| Amyotrophic lateral sclerosis (ALS)                             | 2        | 0           | 0            | 4         | 3        | 2          | 0        | 2                | 12            | 1        |
| Androgen and estrogen metabolism                                | 2        | 2           | 4            | 4         | 1        | 5          | 0        | 1                | 0             | 0        |
| Antigen processing and presentation                             | 9        | 2           | 19           | 13        | 4        | 18         | 3        | 5                | 10            | 15       |
| Apoptosis                                                       | 4        | 2           | 10           | 3         | 2        | 16         | 1        | 7                | 10            | 6        |
| Arachidonic acid metabolism                                     | 4        | 1           | 11           | 5         | 0        | 20         | 2        | 5                | 11            | 0        |
| Arginine and proline metabolism                                 | 4        | 4           | 7            | 3         | 2        | 6          | 5        | 4                | 7             | 0        |
| Arrhythmogenic right ventricular cardiomyopathy (ARVC)          | 0        | 0           | 0            | 0         | 0        | 0          | 0        | 0                | 10            | 0        |
| Ascorbate and aldarate metabolism                               | 1        | 0           | 3            | 1         | 0        | 2          | 1        | 1                | 1             | 2        |
| ATP synthesis                                                   | 3        | 0           | 10           | 5         | 4        | 10         | 3        | 1                | 0             | 4        |
| Atrazine degradation                                            | 0        | 0           | 1            | 0         | 0        | 0          | 0        | 0                | 0             | 0        |
| Axon guidance                                                   | 9        | 7           | 25           | 8         | 4        | 24         | 2        | 8                | 21            | 4        |
| B cell receptor signaling pathway                               | 2        | 3           | 10           | 1         | 1        | 12         | 1        | 4                | 10            | 6        |
| Basal cell carcinoma                                            | 0        | 0           | 0            | 0         | 0        | 0          | 0        | 0                | 9             | 0        |
| Basal transcription factors                                     | 3        | 2           | 2            | 3         | 1        | 6          | 0        | 1                | 6             | 1        |
| Base excision repair                                            | 0        | 0           | 0            | 0         | 0        | 0          | 0        | 0                | 4             | 0        |
| Benzoate degradation via CoA ligation                           | 1        | 0           | 3            | 1         | 1        | 7          | 3        | 4                | 0             | 3        |
| Benzoate degradation via hydroxylation                          | 0        | 2           | 0            | 0         | 0        | 1          | 0        | 0                | 0             | 0        |
| beta-Alanine metabolism                                         | 0        | 0           | 3            | 2         | 3        | 3          | 0        | 2                | 1             | 2        |
| Bile acid biosynthesis                                          | 1        | 2           | 5            | 4         | 2        | 2          | 2        | 1                | 1             | 3        |
| Biosynthesis of steroids                                        | 1        | 2           | 2            | 1         | 0        | 3          | 0        | 1                | 0             | 0        |
| Biosynthesis of unsaturated fatty acids                         | 0        | 0           | 0            | 0         | 0        | 0          | 0        | 0                | 7             | 0        |
| Biotin metabolism                                               | 2        | 0           | 2            | 0         | 0        | 1          | 0        | 0                | 2             | 2        |
| Bisphenol A degradation                                         | 2        | 0           | 4            | 1         | 0        | 3          | 2        | 1                | 0             | 3        |
| Blood group glycolipid biosynthesis - lactoseries               | 0        | 1           | 1            | 2         | 0        | 3          | 0        | 0                | 0             | 0        |
| Blood group glycolipid biosynthesis - neo-lactoseries           | 1        | 2           | 3            | 2         | 0        | 0          | 0        | 0                | 0             | 1        |
| Butanoate metabolism                                            | 2        | 0           | 7            | 3         | 2        | 8          | 1        | 4                | 5             | 3        |
| C21-Steroid hormone metabolism                                  | 1        | 2           | 2            | 1         | 0        | 2          | 0        | 0                | 0             | 1        |
| C5-Branched dibasic acid metabolism                             | 0        | 1           | 0            | 0         | 0        | 0          | 0        | 0                | 0             | 1        |
| Calcium signaling pathway                                       | 13       | 9           | 27           | 10        | 5        | 29         | 8        | 10               | 33            | 8        |

|                                           |    |    |    |    |    |    |    |    |    |    |
|-------------------------------------------|----|----|----|----|----|----|----|----|----|----|
| Caprolactam degradation                   | 0  | 0  | 2  | 2  | 1  | 2  | 2  | 2  | 0  | 1  |
| Carbazole degradation                     | 0  | 0  | 0  | 0  | 0  | 0  | 0  | 0  | 0  | 0  |
| Carbon fixation                           | 0  | 2  | 3  | 2  | 0  | 3  | 0  | 0  | 0  | 0  |
| Cell adhesion molecules (CAMs)            | 15 | 8  | 24 | 16 | 4  | 30 | 5  | 8  | 18 | 15 |
| Cell Communication                        | 7  | 5  | 11 | 10 | 10 | 23 | 4  | 13 | 5  | 8  |
| Cell cycle                                | 2  | 3  | 18 | 5  | 2  | 26 | 3  | 9  | 13 | 7  |
| Chemokine signaling pathway               | 0  | 0  | 0  | 0  | 0  | 0  | 0  | 0  | 22 | 0  |
| Chondroitin sulfate biosynthesis          | 0  | 1  | 4  | 3  | 1  | 5  | 0  | 2  | 0  | 1  |
| Circadian rhythm                          | 1  | 2  | 1  | 1  | 0  | 1  | 0  | 1  | 0  | 0  |
| Citrate cycle (TCA cycle)                 | 3  | 4  | 3  | 1  | 0  | 6  | 2  | 0  | 5  | 2  |
| Colorectal cancer                         | 0  | 0  | 0  | 0  | 0  | 0  | 0  | 0  | 11 | 0  |
| Complement and coagulation cascades       | 2  | 5  | 4  | 4  | 1  | 8  | 3  | 8  | 12 | 5  |
| Cyanoamino acid metabolism                | 0  | 0  | 0  | 0  | 0  | 0  | 0  | 0  | 1  | 0  |
| Cysteine and methionine metabolism        | 0  | 0  | 0  | 0  | 0  | 0  | 0  | 0  | 4  | 0  |
| Cysteine metabolism                       | 2  | 1  | 3  | 0  | 2  | 1  | 1  | 1  | 0  | 0  |
| Cytokine-cytokine receptor interaction    | 15 | 13 | 52 | 11 | 9  | 33 | 13 | 15 | 21 | 11 |
| Cytosolic DNA-sensing pathway             | 0  | 0  | 0  | 0  | 0  | 0  | 0  | 0  | 6  | 0  |
| Dentatorubropallidolusian atrophy (DRPLA) | 1  | 1  | 1  | 0  | 1  | 1  | 2  | 2  | 0  | 0  |
| D-Glutamine and D-glutamate metabolism    | 0  | 0  | 1  | 0  | 0  | 1  | 0  | 1  | 0  | 0  |
| Diterpenoid biosynthesis                  | 0  | 0  | 2  | 1  | 0  | 2  | 0  | 0  | 0  | 0  |
| DNA polymerase                            | 2  | 1  | 3  | 3  | 0  | 7  | 2  | 0  | 0  | 4  |
| DNA replication                           | 0  | 0  | 0  | 0  | 0  | 0  | 0  | 0  | 5  | 0  |
| Dorso-ventral axis formation              | 2  | 2  | 6  | 4  | 2  | 5  | 1  | 0  | 2  | 3  |
| ECM-receptor interaction                  | 4  | 4  | 10 | 8  | 5  | 16 | 5  | 6  | 10 | 4  |
| Endocytosis                               | 0  | 0  | 0  | 0  | 0  | 0  | 0  | 0  | 21 | 0  |
| ErbB signaling pathway                    | 0  | 0  | 0  | 0  | 0  | 0  | 0  | 0  | 14 | 0  |
| Ethylbenzene degradation                  | 0  | 0  | 3  | 1  | 0  | 4  | 4  | 1  | 0  | 0  |
| Fatty acid biosynthesis                   | 0  | 2  | 0  | 0  | 0  | 2  | 0  | 0  | 2  | 0  |
| Fatty acid elongation in mitochondria     | 0  | 1  | 0  | 0  | 0  | 2  | 1  | 0  | 1  | 1  |
| Fatty acid metabolism                     | 0  | 3  | 5  | 2  | 2  | 6  | 0  | 2  | 9  | 3  |
| Fc epsilon RI signaling pathway           | 4  | 1  | 13 | 4  | 4  | 14 | 2  | 3  | 9  | 2  |
| Fc gamma R-mediated phagocytosis          | 0  | 0  | 0  | 0  | 0  | 0  | 0  | 0  | 16 | 0  |
| Fluorene degradation                      | 0  | 0  | 0  | 0  | 0  | 0  | 0  | 0  | 0  | 0  |
| Focal adhesion                            | 11 | 5  | 18 | 15 | 10 | 45 | 4  | 11 | 27 | 4  |
| Folate biosynthesis                       | 1  | 1  | 5  | 1  | 4  | 9  | 1  | 3  | 0  | 2  |
| Fructose and mannose metabolism           | 6  | 1  | 6  | 4  | 4  | 4  | 4  | 3  | 4  | 5  |
| Galactose metabolism                      | 4  | 0  | 3  | 3  | 3  | 4  | 2  | 3  | 2  | 6  |
| gamma-Hexachlorocyclohexane degradation   | 1  | 0  | 4  | 0  | 1  | 7  | 1  | 3  | 0  | 3  |
| Ganglioside biosynthesis                  | 0  | 0  | 2  | 0  | 0  | 1  | 0  | 1  | 0  | 0  |
| Gap junction                              | 4  | 4  | 14 | 4  | 7  | 13 | 1  | 7  | 14 | 3  |
| Globoside metabolism                      | 2  | 0  | 2  | 1  | 1  | 2  | 1  | 1  | 0  | 2  |
| Glutamate metabolism                      | 1  | 4  | 6  | 3  | 1  | 5  | 1  | 4  | 0  | 1  |
| Glutathione metabolism                    | 3  | 3  | 6  | 5  | 0  | 11 | 2  | 8  | 6  | 3  |
| Glycan structures - biosynthesis 1        | 3  | 4  | 17 | 9  | 3  | 20 | 4  | 5  | 0  | 4  |
| Glycan structures - biosynthesis 2        | 4  | 3  | 6  | 6  | 1  | 13 | 1  | 2  | 0  | 5  |
| Glycan structures - degradation           | 1  | 0  | 5  | 0  | 1  | 4  | 0  | 2  | 0  | 2  |
| Glycerolipid metabolism                   | 4  | 3  | 6  | 3  | 1  | 7  | 4  | 2  | 5  | 7  |
| Glycerophospholipid metabolism            | 5  | 4  | 13 | 2  | 0  | 16 | 8  | 6  | 10 | 3  |

|                                                       |    |    |    |    |    |    |    |    |    |    |
|-------------------------------------------------------|----|----|----|----|----|----|----|----|----|----|
| Glycine, serine and threonine metabolism              | 3  | 3  | 6  | 1  | 2  | 8  | 2  | 3  | 0  | 4  |
| Glycolysis / Gluconeogenesis                          | 5  | 2  | 6  | 3  | 1  | 5  | 2  | 2  | 7  | 3  |
| Glycosaminoglycan degradation                         | 1  | 0  | 5  | 0  | 1  | 3  | 0  | 2  | 3  | 1  |
| Glycosphingolipid metabolism                          | 3  | 2  | 4  | 4  | 0  | 8  | 1  | 3  | 0  | 5  |
| Glycosylphosphatidylinositol(GPI)-anchor biosynthesis | 0  | 2  | 3  | 1  | 0  | 3  | 0  | 1  | 3  | 1  |
| Glyoxylate and dicarboxylate metabolism               | 0  | 1  | 3  | 2  | 1  | 1  | 1  | 0  | 3  | 0  |
| GnRH signaling pathway                                | 0  | 0  | 0  | 0  | 0  | 0  | 0  | 0  | 13 | 0  |
| Hedgehog signaling pathway                            | 2  | 2  | 5  | 4  | 0  | 9  | 2  | 4  | 3  | 1  |
| Hematopoietic cell lineage                            | 2  | 4  | 12 | 9  | 4  | 13 | 4  | 4  | 7  | 2  |
| Heparan sulfate biosynthesis                          | 0  | 1  | 2  | 3  | 1  | 1  | 1  | 0  | 0  | 0  |
| Histidine metabolism                                  | 1  | 2  | 7  | 2  | 2  | 3  | 1  | 0  | 3  | 0  |
| Huntington's disease                                  | 3  | 2  | 2  | 3  | 4  | 1  | 1  | 4  | 22 | 4  |
| Inositol metabolism                                   | 0  | 1  | 0  | 0  | 0  | 0  | 0  | 1  | 0  | 0  |
| Inositol phosphate metabolism                         | 3  | 2  | 9  | 2  |    | 9  | 1  | 5  | 9  | 2  |
| Insulin signaling pathway                             | 9  | 6  | 19 | 11 | 4  | 32 | 5  | 12 | 16 | 9  |
| Intestinal immune network for IgA production          | 0  | 0  | 0  | 0  | 0  | 0  | 0  | 0  | 3  | 0  |
| Jak-STAT signaling pathway                            | 10 | 9  | 20 | 9  | 6  | 25 | 8  | 12 | 15 | 11 |
| Keratan sulfate biosynthesis                          | 1  | 0  | 4  | 2  | 0  | 5  | 0  | 1  | 0  | 0  |
| Leukocyte transendothelial migration                  | 8  | 6  | 15 | 7  | 5  | 24 | 2  | 11 | 15 | 3  |
| Limonene and pinene degradation                       | 0  | 0  | 4  | 2  | 1  | 5  | 4  | 2  | 2  | 1  |
| Linoleic acid metabolism                              | 1  | 0  | 6  | 1  | 0  | 15 | 2  | 4  | 6  | 2  |
| Long-term depression                                  | 2  | 2  | 11 | 1  | 4  | 15 | 2  | 3  | 13 | 4  |
| Long-term potentiation                                | 6  | 2  | 12 | 6  | 3  | 14 | 1  | 9  | 11 | 6  |
| Lysine biosynthesis                                   | 0  | 1  | 0  | 0  | 0  | 0  | 0  | 1  | 0  | 0  |
| Lysine degradation                                    | 4  | 2  | 8  | 5  | 1  | 6  | 1  | 5  | 5  | 4  |
| Lysosome                                              | 0  | 0  | 0  | 0  | 0  | 0  | 0  | 0  | 17 | 0  |
| MAPK signaling pathway                                | 21 | 12 | 42 | 13 | 15 | 38 | 9  | 18 | 32 | 15 |
| Maturity onset diabetes of the young                  | 2  | 1  | 3  | 3  | 1  | 5  | 3  | 1  | 3  | 0  |
| Metabolism of xenobiotics by cytochrome P450          | 3  | 3  | 8  | 4  | 0  | 20 | 2  | 9  | 7  | 3  |
| Methane metabolism                                    | 0  | 0  | 1  | 0  | 0  | 1  | 1  | 0  | 1  | 1  |
| Methionine metabolism                                 | 1  | 1  | 2  | 1  | 1  | 2  | 1  | 2  | 2  | 1  |
| mTOR signaling pathway                                | 2  | 2  | 5  | 6  | 1  | 11 | 2  | 5  | 8  | 2  |
| Natural killer cell mediated cytotoxicity             | 5  | 3  | 14 | 6  | 3  | 15 | 1  | 8  | 15 | 7  |
| Neuroactive ligand-receptor interaction               | 17 | 14 | 40 | 15 | 13 | 57 | 17 | 20 | 41 | 11 |
| Neurodegenerative Disorders                           | 4  | 0  | 1  | 3  | 3  | 5  | 1  | 4  | 0  | 3  |
| Neurotrophin signaling pathway                        | 0  | 0  | 0  | 0  | 0  | 0  | 0  | 0  | 16 | 0  |
| N-Glycan biosynthesis                                 | 2  | 3  | 5  | 0  | 1  | 8  | 1  | 2  | 7  | 3  |
| N-Glycan degradation                                  | 1  | 0  | 4  | 0  | 0  | 3  | 0  | 2  | 0  | 2  |
| Nicotinate and nicotinamide metabolism                | 2  | 0  | 5  | 1  | 1  | 4  | 3  | 3  | 3  | 2  |
| Nitrobenzene degradation                              | 1  | 1  | 2  | 2  | 1  | 2  | 0  | 0  | 0  | 0  |
| Nitrogen metabolism                                   | 3  | 2  | 3  | 1  | 2  | 2  | 0  | 3  | 4  | 0  |
| Notch signaling pathway                               | 2  | 3  | 6  | 5  | 0  | 8  | 2  | 5  | 7  | 1  |
| Novobiocin biosynthesis                               | 1  | 0  | 0  | 0  | 0  | 0  | 0  | 1  | 0  | 0  |
| Nucleotide excision repair                            | 0  | 0  | 0  | 0  | 0  | 0  | 0  | 0  | 6  | 0  |
| Nucleotide sugars metabolism                          | 1  | 0  | 2  | 1  | 0  | 2  | 1  | 1  | 0  | 2  |
| O-Glycan biosynthesis                                 | 1  | 0  | 2  | 1  | 1  | 2  | 1  | 0  | 5  | 1  |
| Olfactory transduction                                | 1  | 0  | 6  | 2  | 5  | 2  | 1  | 5  | 16 | 2  |
| One carbon pool by folate                             | 0  | 0  | 2  | 2  | 1  | 1  | 1  | 2  | 0  | 1  |

|                                                     |    |   |    |    |    |    |   |    |    |    |
|-----------------------------------------------------|----|---|----|----|----|----|---|----|----|----|
| Oxidative phosphorylation                           | 8  | 4 | 18 | 10 | 11 | 23 | 4 | 10 | 9  | 5  |
| p53 signaling pathway                               | 0  | 0 | 0  | 0  | 0  | 0  | 0 | 0  | 9  | 0  |
| Pantothenate and CoA biosynthesis                   | 0  | 0 | 3  | 1  | 0  | 3  | 2 | 2  | 0  | 1  |
| Parkinson's disease                                 | 0  | 0 | 5  | 0  | 1  | 4  | 1 | 1  | 13 | 2  |
| Pentose and glucuronate interconversions            | 0  | 1 | 2  | 0  | 1  | 1  | 0 | 1  | 4  | 1  |
| Pentose phosphate pathway                           | 2  | 2 | 8  | 3  | 1  | 2  | 0 | 0  | 2  | 0  |
| Peroxisome                                          | 0  | 0 | 0  | 0  | 0  | 0  | 0 | 0  | 11 | 0  |
| Phenylalanine metabolism                            | 2  | 2 | 5  | 1  | 1  | 4  | 4 | 2  | 2  | 0  |
| Phenylalanine, tyrosine and tryptophan biosynthesis | 1  | 0 | 1  | 0  | 0  | 1  | 0 | 1  | 0  | 1  |
| Phosphatidylinositol signaling system               | 4  | 4 | 11 | 4  | 2  | 12 | 3 | 8  | 12 | 3  |
| Prion disease                                       | 0  | 1 | 0  | 2  | 2  | 2  | 2 | 0  | 0  | 2  |
| Propanoate metabolism                               | 2  | 4 | 4  | 2  | 3  | 5  | 1 | 4  | 5  | 2  |
| Proteasome                                          | 3  | 3 | 6  | 2  | 0  | 6  | 1 | 4  | 7  | 1  |
| Protein export                                      | 1  | 0 | 3  | 1  | 0  | 0  | 0 | 0  | 4  | 0  |
| Proximal tubule bicarbonate reclamation             | 0  | 0 | 0  | 0  | 0  | 0  | 0 | 0  | 3  | 0  |
| Purine metabolism                                   | 5  | 9 | 25 | 14 | 6  | 26 | 6 | 5  | 18 | 7  |
| Pyrimidine metabolism                               | 4  | 4 | 14 | 8  | 3  | 17 | 4 | 2  | 15 | 6  |
| Pyruvate metabolism                                 | 2  | 1 | 3  | 1  | 1  | 8  | 0 | 2  | 8  | 2  |
| Reductive carboxylate cycle (CO2 fixation)          | 1  | 5 | 0  | 0  | 0  | 1  | 1 | 1  | 0  | 1  |
| Regulation of actin cytoskeleton                    | 11 | 6 | 20 | 14 | 8  | 44 | 5 | 14 | 33 | 6  |
| Regulation of autophagy                             | 2  | 1 | 4  | 1  | 0  | 7  | 2 | 0  | 2  | 2  |
| Retinol metabolism                                  | 0  | 0 | 0  | 2  | 0  | 2  | 0 | 0  | 11 | 0  |
| Riboflavin metabolism                               | 1  | 0 | 3  | 1  | 1  | 3  | 1 | 0  | 0  | 1  |
| Ribosome                                            | 2  | 6 | 5  | 1  | 3  | 12 | 2 | 4  | 14 | 4  |
| RNA degradation - Mus musculus (mouse) (10)         | 0  | 0 | 0  | 0  | 0  | 0  | 0 | 0  | 10 | 0  |
| RNA polymerase                                      | 0  | 1 | 5  | 2  | 2  | 5  | 1 | 0  | 3  | 0  |
| Selenoamino acid metabolism                         | 2  | 2 | 4  | 2  | 2  | 4  | 0 | 1  | 4  | 2  |
| SNARE interactions in vesicular transport           | 2  | 0 | 4  | 0  | 2  | 5  | 1 | 1  | 4  | 3  |
| Sphingolipid metabolism                             | 0  | 0 | 0  | 0  | 0  | 0  | 0 | 0  | 6  | 0  |
| Spliceosome                                         | 0  | 0 | 0  | 0  | 0  | 0  | 0 | 0  | 22 | 0  |
| Starch and sucrose metabolism                       | 2  | 2 | 8  | 3  | 4  | 10 | 2 | 2  | 4  | 2  |
| Stilbene, coumarine and lignin biosynthesis         | 0  | 0 | 0  | 1  | 0  | 2  | 1 | 0  | 0  | 0  |
| Streptomycin biosynthesis                           | 0  | 0 | 0  | 0  | 1  | 2  | 1 | 0  | 0  | 0  |
| Styrene degradation                                 | 0  | 1 | 0  | 0  | 0  | 0  | 0 | 0  | 0  | 1  |
| Sulfur metabolism                                   | 1  | 0 | 1  | 0  | 0  | 3  | 0 | 0  | 1  | 0  |
| Synthesis and degradation of ketone bodies          | 0  | 0 | 2  | 0  | 0  | 2  | 0 | 1  | 1  | 0  |
| T cell receptor signaling pathway                   | 3  | 3 | 13 | 4  | 2  | 16 | 2 | 7  | 14 | 9  |
| Taste transduction                                  | 1  | 0 | 4  | 2  | 2  | 3  | 0 | 3  | 12 | 1  |
| Taurine and hypotaurine metabolism                  | 0  | 0 | 2  | 0  | 2  | 1  | 1 | 2  | 2  | 1  |
| Terpenoid backbone biosynthesis                     | 0  | 0 | 0  | 0  | 0  | 0  | 0 | 0  | 2  | 0  |
| Terpenoid biosynthesis                              | 0  | 1 | 0  | 0  | 0  | 2  | 0 | 1  | 0  | 0  |
| Tetrachloroethene degradation                       | 1  | 0 | 2  | 1  | 0  | 1  | 1 | 1  | 0  | 2  |
| TGF-beta signaling pathway                          | 6  | 3 | 11 | 4  | 3  | 20 | 3 | 6  | 7  | 7  |
| Thiamine metabolism                                 | 1  | 0 | 1  | 0  | 1  | 0  | 0 | 0  | 1  | 0  |
| Tight junction                                      | 10 | 4 | 14 | 4  | 5  | 20 | 3 | 12 | 16 | 5  |
| Toll-like receptor signaling pathway                | 3  | 2 | 14 | 3  | 1  | 14 | 1 | 7  | 8  | 4  |
| Tryptophan metabolism                               | 2  | 2 | 12 | 5  | 4  | 11 | 3 | 5  | 8  | 3  |
| Type I diabetes mellitus                            | 9  | 5 | 19 | 10 | 2  | 17 | 4 | 3  | 8  | 12 |

|                                             |   |   |    |   |   |    |   |   |    |    |
|---------------------------------------------|---|---|----|---|---|----|---|---|----|----|
| Type II diabetes mellitus                   | 3 | 2 | 9  | 6 | 1 | 11 | 2 | 4 | 5  | 2  |
| Tyrosine metabolism                         | 4 | 5 | 10 | 4 | 3 | 7  | 3 | 5 | 4  | 2  |
| Ubiquinone biosynthesis                     | 2 | 0 | 1  | 0 | 1 | 2  | 0 | 0 | 16 | 0  |
| Urea cycle and metabolism of amino groups   | 1 | 0 | 3  | 0 | 1 | 3  | 3 | 4 | 0  | 0  |
| Valine, leucine and isoleucine biosynthesis | 2 | 1 | 3  | 2 | 1 | 1  | 1 | 0 | 2  | 0  |
| Valine, leucine and isoleucine degradation  | 1 | 4 | 6  | 1 | 3 | 10 | 3 | 4 | 4  | 1  |
| Vascular smooth muscle contraction          | 0 | 0 | 0  | 0 | 0 | 0  | 0 | 0 | 16 | 0  |
| Vasopressin-regulated water reabsorption    | 0 | 0 | 0  | 0 | 0 | 0  | 0 | 0 | 6  | 0  |
| VEGF signaling pathway                      | 4 | 2 | 12 | 1 | 2 | 19 | 1 | 4 | 14 | 3  |
| Vitamin B6 metabolism                       | 1 | 0 | 1  | 0 | 1 | 0  | 0 | 0 | 0  | 0  |
| Wnt signaling pathway                       | 7 | 5 | 23 | 8 | 4 | 19 | 1 | 8 | 15 | 10 |

---
