# Supplementary material for: Modulation of miRNA Expression by Dietary Polyphenols in apoE Deficient Mice: A New Mechanism of the Action of Polyphenols
Source: PubMed Central journal article supplement (PMC3254631; doi:10.1371/journal.pone.0029837), 2012-01-10
Supplement: pone.0029837.s013.pdf [file pone.0029837.s013.pdf]

## Supplement table S8

| <i>Cell processes</i>                   | ApoE -/- | Cafeic acid | Ferulic acid | Quercetin | Catechin | Hesperidin | Narangin | Proanthocyanidin | Anthocyanidin | Curcumin |
|-----------------------------------------|----------|-------------|--------------|-----------|----------|------------|----------|------------------|---------------|----------|
| Adherens junction                       | 3        | 2           | 9            | 4         | 1        | 14         | 1        | 4                | 13            | 3        |
| Antigen processing and presentation     | 9        | 2           | 19           | 13        | 4        | 18         | 3        | 5                | 10            | 15       |
| Axon guidance                           | 9        | 7           | 25           | 8         | 4        | 24         | 2        | 8                | 21            | 4        |
| Cell adhesion molecules (CAMs)          | 15       | 8           | 24           | 16        | 4        | 30         | 5        | 8                | 18            | 15       |
| Cell Communication                      | 7        | 5           | 11           | 10        | 10       | 23         | 4        | 13               | 5             | 8        |
| Cytokine-cytokine receptor interaction  | 15       | 13          | 52           | 11        | 9        | 33         | 13       | 15               | 21            | 11       |
| ECM-receptor interaction                | 4        | 4           | 10           | 8         | 5        | 16         | 5        | 6                | 10            | 4        |
| Focal adhesion                          | 11       | 5           | 18           | 15        | 10       | 45         | 4        | 11               | 27            | 4        |
| Gap junction                            | 4        | 4           | 14           | 4         | 7        | 13         | 1        | 7                | 14            | 3        |
| Leukocyte transendothelial migration    | 8        | 6           | 15           | 7         | 5        | 24         | 2        | 11               | 15            | 3        |
| Long-term depression                    | 2        | 2           | 11           | 1         | 4        | 15         | 2        | 3                | 13            | 4        |
| Long-term potentiation                  | 6        | 2           | 12           | 6         | 3        | 14         | 1        | 9                | 11            | 6        |
| Neuroactive ligand-receptor interaction | 17       | 14          | 40           | 15        | 13       | 57         | 17       | 20               | 41            | 11       |
| Regulation of actin cytoskeleton        | 11       | 6           | 20           | 14        | 8        | 44         | 5        | 14               | 33            | 6        |
| Tight junction                          | 10       | 4           | 14           | 4         | 5        | 20         | 3        | 12               | 16            | 5        |
| <i>Signalling</i>                       |          |             |              |           |          |            |          |                  |               |          |
| Adipocytokine signaling pathway         | 3        | 2           | 6            | 7         | 2        | 10         | 1        | 3                | 5             | 6        |
| B cell receptor signaling pathway       | 2        | 3           | 10           | 1         | 1        | 12         | 1        | 4                | 10            | 6        |
| Calcium signaling pathway               | 13       | 9           | 27           | 10        | 5        | 29         | 8        | 10               | 33            | 8        |
| Fc epsilon RI signaling pathway         | 4        | 1           | 13           | 4         | 4        | 14         | 2        | 3                | 9             | 2        |
| Insulin signaling pathway               | 9        | 6           | 19           | 11        | 4        | 32         | 5        | 12               | 16            | 9        |

|                                       |    |    |    |    |    |    |   |    |    |    |
|---------------------------------------|----|----|----|----|----|----|---|----|----|----|
| Jak-STAT signaling pathway            | 10 | 9  | 20 | 9  | 6  | 25 | 8 | 12 | 15 | 11 |
| MAPK signaling pathway                | 21 | 12 | 42 | 13 | 15 | 38 | 9 | 18 | 32 | 15 |
| mTOR signaling pathway                | 2  | 2  | 5  | 6  | 1  | 11 | 2 | 5  | 8  | 2  |
| Phosphatidylinositol signaling system | 4  | 4  | 11 | 4  | 2  | 12 | 3 | 8  | 12 | 3  |
| Propanoate metabolism                 | 2  | 4  | 4  | 2  | 3  | 5  | 1 | 4  | 5  | 2  |
| Purine metabolism                     | 5  | 9  | 25 | 14 | 6  | 26 | 6 | 5  | 18 | 7  |
| Pyrimidine metabolism                 | 4  | 4  | 14 | 8  | 3  | 17 | 4 | 2  | 15 | 6  |
| T cell receptor signaling pathway     | 3  | 3  | 13 | 4  | 2  | 16 | 2 | 7  | 14 | 9  |
| TGF-beta signaling pathway            | 6  | 3  | 11 | 4  | 3  | 20 | 3 | 6  | 7  | 7  |
| Toll-like receptor signaling pathway  | 3  | 2  | 14 | 3  | 1  | 14 | 1 | 7  | 8  | 4  |
| VEGF signaling pathway                | 4  | 2  | 12 | 1  | 2  | 19 | 1 | 4  | 14 | 3  |
| Wnt signaling pathway                 | 7  | 5  | 23 | 8  | 4  | 19 | 1 | 8  | 15 | 10 |

**Metabolism**

|                                 |   |   |    |    |    |    |   |    |   |    |
|---------------------------------|---|---|----|----|----|----|---|----|---|----|
| ABC transporters - General      | 4 | 2 | 3  | 2  | 3  | 6  | 3 | 2  | 8 | 1  |
| Bile acid biosynthesis          | 1 | 2 | 5  | 4  | 2  | 2  | 2 | 1  | 1 | 3  |
| Fructose and mannose metabolism | 6 | 1 | 6  | 4  | 4  | 4  | 4 | 3  | 4 | 5  |
| Glycerolipid metabolism         | 4 | 3 | 6  | 3  | 1  | 7  | 4 | 2  | 5 | 7  |
| Glycolysis / Gluconeogenesis    | 5 | 2 | 6  | 3  | 1  | 5  | 2 | 2  | 7 | 3  |
| Lysine degradation              | 4 | 2 | 8  | 5  | 1  | 6  | 1 | 5  | 5 | 4  |
| Methionine metabolism           | 1 | 1 | 2  | 1  | 1  | 2  | 1 | 2  | 2 | 1  |
| Oxidative phosphorylation       | 8 | 4 | 18 | 10 | 11 | 23 | 4 | 10 | 9 | 5  |
| Starch and sucrose metabolism   | 2 | 2 | 8  | 3  | 4  | 10 | 2 | 2  | 4 | 2  |
| Tryptophan metabolism           | 2 | 2 | 12 | 5  | 4  | 11 | 3 | 5  | 8 | 3  |
| Type I diabetes mellitus        | 9 | 5 | 19 | 10 | 2  | 17 | 4 | 3  | 8 | 12 |
| Type II diabetes mellitus       | 3 | 2 | 9  | 6  | 1  | 11 | 2 | 4  | 5 | 2  |
| Tyrosine metabolism             | 4 | 5 | 10 | 4  | 3  | 7  | 3 | 5  | 4 | 2  |

|              |                                            |   |   |    |   |   |    |   |   |    |   |
|--------------|--------------------------------------------|---|---|----|---|---|----|---|---|----|---|
| <i>Other</i> | Valine, leucine and isoleucine degradation | 1 | 4 | 6  | 1 | 3 | 10 | 3 | 4 | 4  | 1 |
|              | Ribosome                                   | 2 | 6 | 5  | 1 | 3 | 12 | 2 | 4 | 14 | 4 |
|              | Natural killer cell mediated cytotoxicity  | 5 | 3 | 14 | 6 | 3 | 15 | 1 | 8 | 15 | 7 |
|              | Huntington's disease                       | 3 | 2 | 2  | 3 | 4 | 1  | 1 | 4 | 22 | 4 |
|              | Hematopoietic cell lineage                 | 2 | 4 | 12 | 9 | 4 | 13 | 4 | 4 | 7  | 2 |
|              | Complement and coagulation cascades        | 2 | 5 | 4  | 4 | 1 | 8  | 3 | 8 | 12 | 5 |
|              | Cell cycle                                 | 2 | 3 | 18 | 5 | 2 | 26 | 3 | 9 | 13 | 7 |
|              | Apoptosis                                  | 4 | 2 | 10 | 3 | 2 | 16 | 1 | 7 | 10 | 6 |
|              | Aminoacyl-tRNA biosynthesis                | 2 | 3 | 4  | 3 | 1 | 3  | 1 | 1 | 5  | 1 |
